# Supplementary material
Source: PubMed Central journal article supplement (PMC8960180)
Supplement: mmc1-suppl.pdf [file mmc1-suppl.pdf]

## Supplemental Information

### Discovery of Drug-like Ligands for the Mac1 Domain of SARS-CoV-2 Nsp3

Rajdeep S. Viridi, Robert V. Bavisotto, Nicholas C. Hopper, Nemanja Vuksanovic, Trevor R. Melkonian, Nicholas R. Silvaggi & David N. Frick\*

**Table S1.** Crystallographic data collection and model refinement statistics for the SARS-CoV-2 Mac1 domain in complex with cAMP.

| Data collection                                |                            |
|------------------------------------------------|----------------------------|
| Resolution range (Å) (last shell) <sup>a</sup> | 24.70 - 1.55 (1.61 - 1.55) |
| Space Group                                    | P 2 <sub>1</sub>           |
| <i>a</i> , <i>b</i> , <i>c</i> (Å)             | 37.2, 33.0, 60.5           |
| <i>α</i> , <i>β</i> , <i>γ</i> (°)             | 90.0, 96.4, 90.0           |
| R <sub>merge</sub> <sup>a</sup>                | 0.076 (0.291)              |
| R <sub>meas</sub> <sup>a</sup>                 | 0.091 (0.344)              |
| R <sub>pim</sub> <sup>a</sup>                  | 0.049 (0.182)              |
| CC <sub>1/2</sub> <sup>a</sup>                 | 0.992 (0.891)              |
| No. of unique reflections <sup>a</sup>         | 20508 (1938)               |
| Completeness (%) <sup>a</sup>                  | 95.05 (90.9)               |
| Multiplicity <sup>a</sup>                      | 3.4 (3.3)                  |
| $\langle I/\sigma(I) \rangle$ <sup>a</sup>     | 10.9 (4.2)                 |
| Model Refinement                               |                            |
| Reflections used in refinement                 | 20433 (1938) <sup>b</sup>  |
| Reflections used for R <sub>free</sub>         | 1998 (189)                 |
| R <sub>cryst</sub> (R <sub>free</sub> )        | 0.157 (0.182)              |
| Average B factor (Å <sup>2</sup> )             | 20.3                       |
| Protein atoms                                  | 19.1                       |
| Solvent                                        | 32.0                       |
| Ligand                                         | 17.2                       |
| Root-mean-square (RMS) deviations              |                            |
| Bond lengths (Å)                               | 0.008                      |
| Bond angles (°)                                | 0.893                      |
| Coordinate error (Å)                           | 0.11                       |
| Ramachandran statistics                        |                            |
| Favored/allowed/outliers (%)                   | 99.4/0.6/0.0               |
| Rotamer outliers (%)                           | 0.8                        |
| Clashscore                                     | 0.8                        |

<sup>a</sup>Values in parentheses apply to the high-resolution shell indicated in the resolution row

<sup>b</sup>The limits of the high-resolution bin for refinement were 1.59 – 1.55 Å
